# Supplementary material
Source: publisher site journal article supplement (https://www.dovepress.com/get_supplementary_file.php?f=485083.docx)
Supplement: Supplementary file 1 [file get_supplementary_file.php]

Supplementary Table 1. The results of mNGS in blood.

| Genus | Sequence number | Species | Sequence number | Coverage | Relative abundance |
| --- | --- | --- | --- | --- | --- |
| *Coxiella* | 374 | *Coxiella burnetii* | 374 | 1.52% | 5.0% |

Supplementary table 2. Summary of case report of Q-fever in solid organ transplant patients.

| Author | Reported time | Transplanted organ | Age | Gender | Transplant time at the onset of symptoms | Clinical manifestation | Organ involvement | Method | Diagnosis time | Q-fever type | Anti-rejection drugs | Whether to reduce/stop anti-rejection drugs | Treatment | Prognosis |
| --- | --- | --- | --- | --- | --- | --- | --- | --- | --- | --- | --- | --- | --- | --- |
| Christopher P. Larsen et al.[1] | 2006 | Kidney | 56 | Male | 1.5 years | Diarrhea, loss of appetite, myalgia, arthralgia, malaise, dyspnea, abdominal pain, chest pain, mental changes | Lung, liver, kidney | Serology | Day 23 of admission | Acute | Tacrolimus, sirolimus, and prednisone | Suspended | Doxycycline for 1 month | Live |
| I. Godinho et al.[2] | 2015 | Kidney | 60 | Male | -- | Fever, night sweats, anemia | None | Serology | -- | Chronic | Sirolimus, mycophenolate mofetil, prednisolone | -- | Doxycycline and hydroxychloroquine for over 6 months | Live |
| Budgin AM et al.[3] | 2020 | Kidney | 59 | Female | -- | Pneumonia, respiratory failure, suspected infective endocarditis | Lung, heart | Serology | More than 5 days after admission | Acute + chronic(Suspected) | Sirolimus, mycophenolate mofetil, prednisone | Suspend sirolimus | Doxycycline and hydroxychloroquine for over 18 months | Live |
| Bonnie Ann Sarrell et al.[4] | 2021 | Kidney | 35 | Male | 3 years | Intermittent fever, fatigue, malaise, and weight loss | Liver, spleen | Serology, spleen biopsy, PET/CT | -- | Acute | Tacrolimus, mycophenolate mofetil, and prednisone | -- | Doxycycline for 2 weeks | Live |
| Joe Poch et al.[5] | 2018 | Pancreas, Kidney | 46 | Male | 3.5 years | Cough, difficulty breathing | Lung | Serology, bronchial biopsy | -- | Chronic | Tacrolimus, mycophenolate mofetil, and prednisone | No | Doxycycline and hydroxychloroquine for over 16 months | Live |
| Deeksha Jandhyala et al.[6] | 2018 | Heart, Kidney | 59 | Male | Diagnosed 6 years before transplantation and 2 years after transplantation | Low-grade fever, mitral regurgitation, aortic regurgitation | Heart, kidney | Serology, PCR of mitral valves for native and allogeneic transplantation | 2 years after transplantation | Chronic | Tacrolimus, prednisone | -- | Doxycycline and hydroxychloroquine for over 21 months | Live |
| MM Loudon et al.[7] | 1988 | Liver, thymus | 5 | Female | 4 years | High fever, severe headache, photophobia, neck and chest myalgia, sore throat, dry cough, irritability | None | Serology | More than 6 weeks | Acute + Chronic | None mentioned | -- | Tetracycline for 4 monthsl | Serology improves but leukemia bone marrow relapses and dies |
| Lindsay A. Petty et al.[8] | 2017 | Liver | 51 | Male | 7 years | Fever, chills, stiffness, palpitations, fatigue, and myalgia | None | Serology | -- | Acute + potential chronic | Mycophenolate mofetil, tacrolimus | -- | Doxycycline for 4 weeks, 1 year later doxycycline and hydroxychloroquine for 3 months to treat underlying chronic Q fever | Live |
| This case | 2024 | Liver | 41 | Male | 5 years | Fever, chills, chills, headache, neck and shoulder muscle pain | None | mNGS | 2 days | Acute | Tacrolimus, mycophenolate mofetil | decrease | Doxycycline for 18 days | Live |

Reference:

1. Larsen CP, Bell JM, Ketel BL, Walker PD. Infection in renal transplantation: a case of acute Q fever. Am J Kidney Dis **2006**; 48:321–326.

2. Godinho I, Nogueira EL, Santos CM, et al. Chronic Q Fever in a renal transplant recipient: a case report. Transplant Proc **2015**; 47:1045–1047.

3. Budgin AM, Abidi MZ, Bajrovic V, Miller MA, Johnson SC. Severe acute Q fever pneumonia complicated by presumed persistent localized Q fever endocarditis in a renal transplant recipient: A case report and review of the literature. Transpl Infect Dis **2020**; 22:e13230.

4. Sarrell BA, Laurenzano J, Freitas J, Concepcion BP. Q fever presenting with hepatic and splenic lesions in a kidney transplant recipient. Transpl Infect Dis **2021**; 23:e13699.

5. Poch J, Ince D, Thomas C, Dhakal R, Gajurel K. Unusual presentation of Q fever in a kidney-pancreas transplant recipient. Transpl Infect Dis **2019**; 21:e13037.

6. Jandhyala D, Farid S, Mahmood M, et al. Unrecognized pre-transplant disseminated Coxiella burnetti infection diagnosed in a post-transplant heart-kidney recipient. Transpl Infect Dis **2018**; 20:e12962.

7. Loudon MM, Thompson EN. Severe combined immunodeficiency syndrome, tissue transplant, leukaemia, and Q fever. Arch Dis Child **1988**; 63:207–209.

8. Petty LA, Te HS, Pursell K. A case of Q fever after liver transplantation. Transpl Infect Dis **2017**; 19.
